# Supplementary material for: Exploiting functional regions in the viral RNA genome as druggable entities
Source: eLife journal article supplement (doi:10.7554/elife.103923), 2024-12-19
Supplement: fig3-figsupp7-data1 [file elife-103923-fig3-figsupp7-data1-v1.zip]

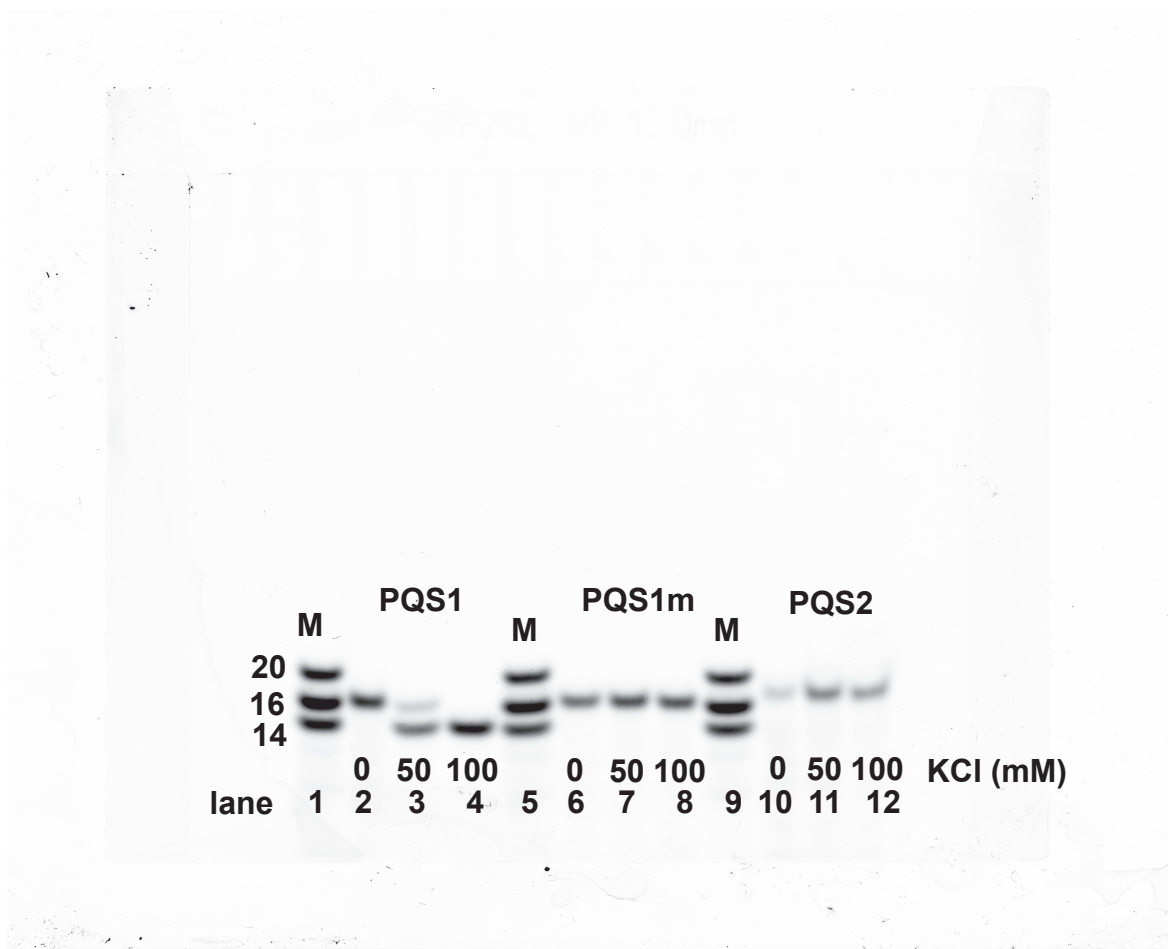

**Figure 3—figure supplement 7, source data1.** Original gel corresponding to Figure 3B. Native-PAGE analysis of the migration of G4 RNAs (PQS1) and G4 mutant RNAs (PQS1m) was performed under different KCl concentrations. Lanes 1, 5, 9, RNA ladder; lanes 2, 3, 4, PQS1; lanes 6, 7, 8, PQS1m; Lanes 10, 11, 12, PQS2 (not shown in figure 3).
